# Supplementary material
Source: MDPI journal article supplement (https://www.mdpi.com/2071-1050/15/2/1010)
Supplement: s1 [file s1]

# Methane and nitrous oxide emissions from a temperate peatland under simulated enhanced nitrogen deposition

**Xue Meng<sup>a</sup>, Zhiguo Zhu<sup>a</sup>, Jing Xue<sup>b,c</sup>, Chunguang Wang<sup>b,c</sup>, Xiaoxin Sun<sup>b,c</sup>**

<sup>a</sup> College of Landscape and Horticulture, Wuhu Institute of Technology, *Wuhu 241006, China*

<sup>b</sup> *School of Forestry, Northeast Forestry University, Harbin 150040, China*

<sup>c</sup> *Heilongjiang Sanjiang Plain Wetland Ecosystem Research Station, Fuyuan 156500, China*

**Corresponding author,**

Xiaoxin Sun, Ph.D.

School of Forestry, Northeast Forestry University, Harbin 150040, China

E-mail: sunxiaoxin@nefu.edu.cn

Tel.: +86-451-82191821

Fax.: +86-451-82191821

Supplementary Figures.

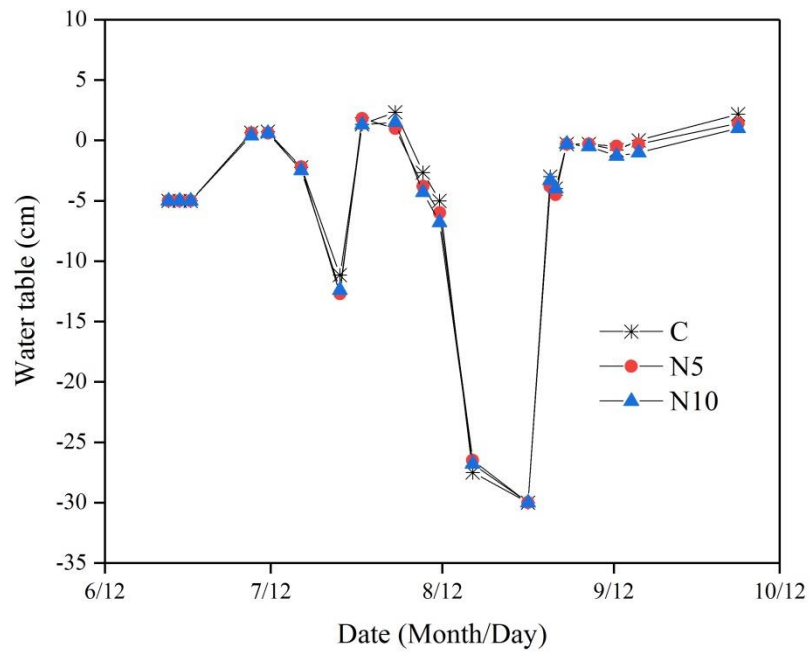

Figure S1. Seasonal variation of water table in control and N addition microcosms

CK is the control microcosms, N5 and N10 are the treated microcosms of 5 and 10 times of natural N deposition, respectively.

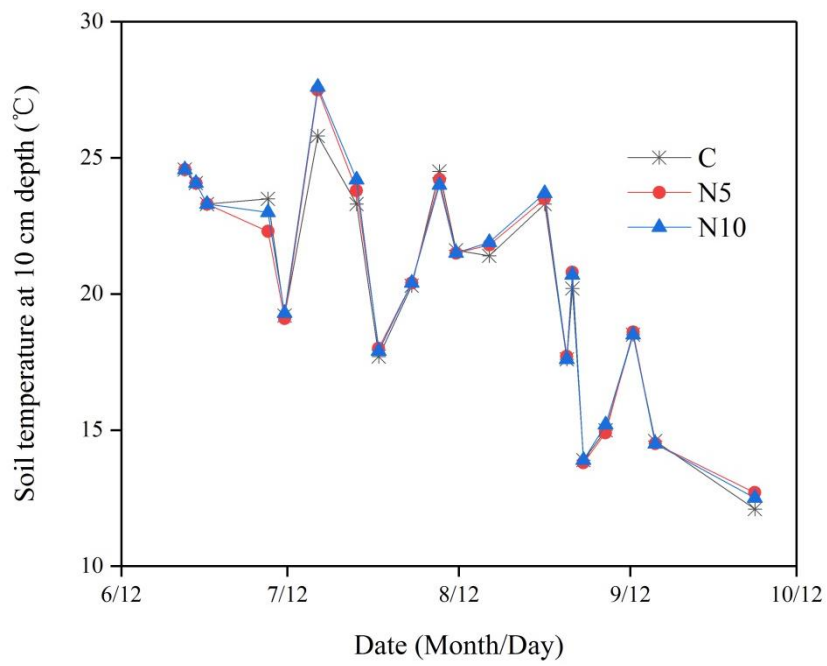

Figure S2. Seasonal variation of soil temperature in 10 cm depth in control and N addition microcosms

CK is the control microcosms, N5 and N10 are the treated microcosms of 5 and 10 times of natural N deposition, respectively.
